# Supplementary material for: A Systematically Improved High Quality Genome and Transcriptome of the Human Blood Fluke Schistosoma mansoni
Source: PLOS journal article supplement (doi:10.1371/journal.pntd.0001455), 2012-01-10

**A**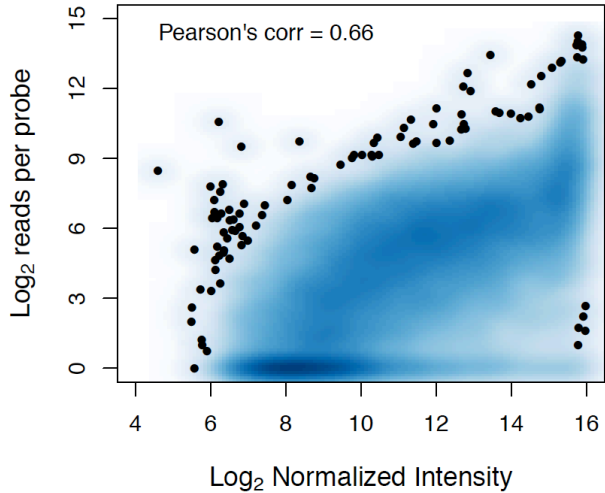**B**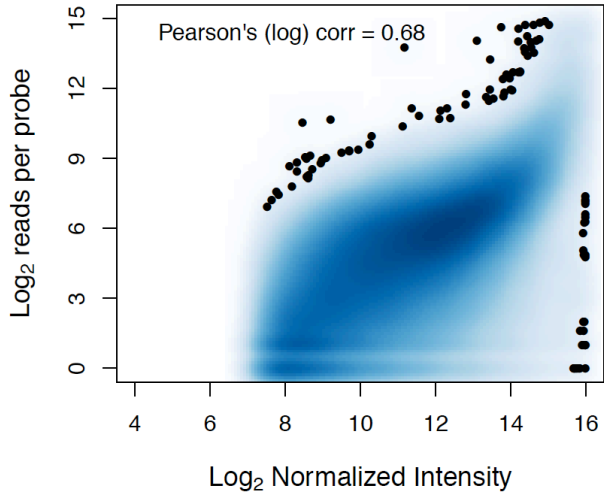

Supplement: S8 (10.1371/journal.pntd.0001455.s008) [file journal.pntd.0001455.s008]
